# Supplementary material
Source: PubMed Central journal article supplement (PMC7807217)
Supplement: 41429_2020_390_MOESM1_ESM.pdf [file 41429_2020_390_MOESM1_ESM.pdf]

# Supporting Information

**Diatretol, an  $\alpha$ ,  $\alpha'$ -dioxo-diketopiperazine, is a potent *in vitro* and *in vivo* antimalarial**

Aki Ishiyama<sup>1,2§</sup>, Rei Hokari<sup>1§</sup>, Kenichi Nonaka<sup>1,2</sup>, Takuya Chiba<sup>2</sup>, Hiromi Miura<sup>1,2</sup>, Kazuhiko Otoguro<sup>1</sup> and Masato Iwatsuki<sup>1,2\*</sup>

<sup>1</sup> Ōmura Satoshi Memorial Institute, Kitasato University, 5-9-1 Shirokane, Minato-ku, Tokyo 108-8641, Tokyo, Japan

<sup>2</sup> Graduate School of Infection Control Sciences, Kitasato University, 5-9-1 Shirokane, Minato-ku, Tokyo 108-8641, Tokyo, Japan

Correspondence: Associate Professor M Iwatsuki, Ōmura Satoshi Memorial Institute, Kitasato University, 5-9-1 Shirokane, Minato-ku, Tokyo 108-8641, Japan.

E-mail: iwatuki@lisci.kitasato-u.ac.jp

§These authors contributed equally to this work.

## Contents

S1. Isolation and taxonomy of *Metarhizium anisopliae* FKI-7223

Scheme S1. Fermentation and isolation of diatretole (1) from *Metarhizium anisopliae* FKI-7223

Scheme S2. Preparation of lepidamide A (2), lepidamide B (3), and megasporizine (4), from diatretole (1)

Scheme S3. Preparation of albonoursin (5) from diatretole (1)

Fig. S1. Structures of naturally occurring  $\alpha$ ,  $\alpha'$ -dioxo-diketopiperazines

Fig. S2. *In vitro* antimalarial activity of diatretole (1)

### S1. Isolation and taxonomy of *Metarhizium anisopliae* FKI-7223

The fungal strain FKI-7223 isolated from a soil around root of *Angelica keiskei* collected in Nijima, Izu Islands, Tokyo, Japan. This strain was identified with genus *Metarhizium* by producing branched conidiophores, with apices of branches bearing one to several phialides, and producing conidial chains. The ITS sequence of FKI-7223 was compared to sequences in the GenBank database by BLASTN 2.11.0 analysis (Stephen et al. 1997). The sequence of FKI-7223 was 99.8% similar to the sequence of AESEF 7487 (ex-type of *Metarhizium anisopliae*, GenBank accession number NR\_132017). The producing strain FKI-7223 was assigned to the genus *Metarhizium* based on its morphology and sequence analysis.

#### Reference

Stephen F. Altschul, Thomas L. Madden, Alejandro A. Schäffer, Jinghui Zhang, Zheng Zhang, Webb Miller, and David J. Lipman (1997), "Gapped BLAST and PSI-BLAST: a new generation of protein database search programs", *Nucleic Acids Res.* 25:3389-3402.

### Scheme S1. Fermentation and isolation of diatretole (1) from *Metarhizium anisopliae* FKI-7223

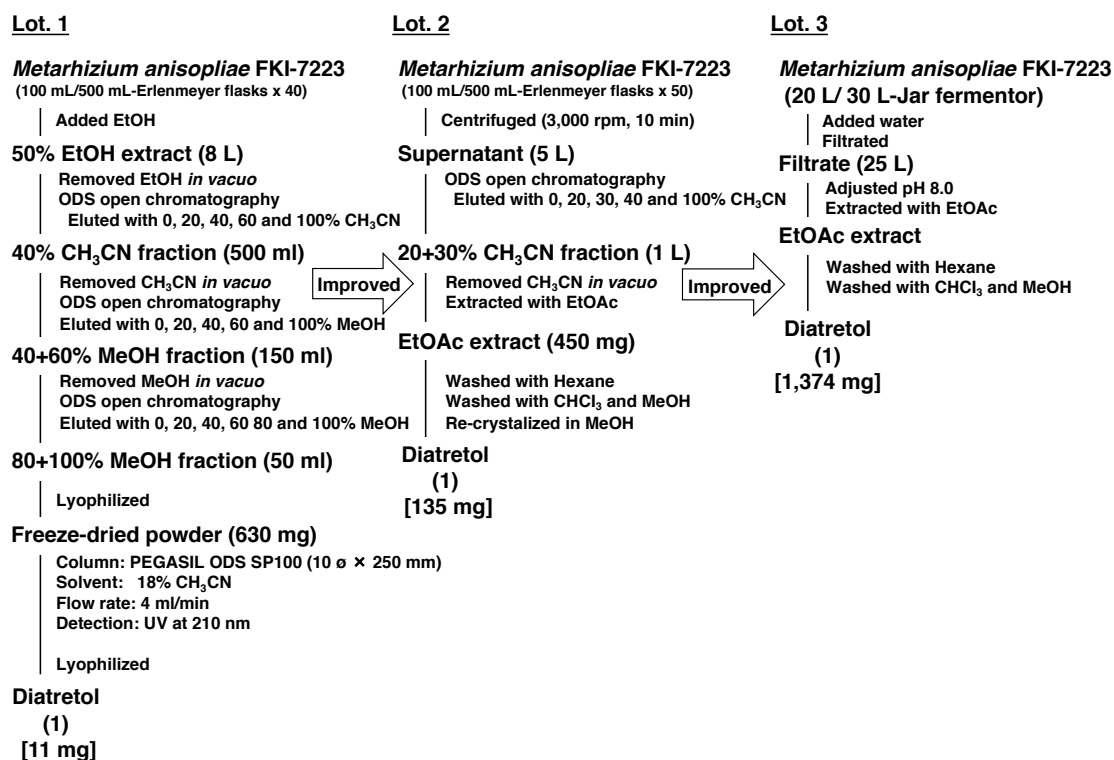

Scheme S2. Preparation of lepistamide A (2), lepistamide B (3), and megasporizine (4) from diatretole (1)

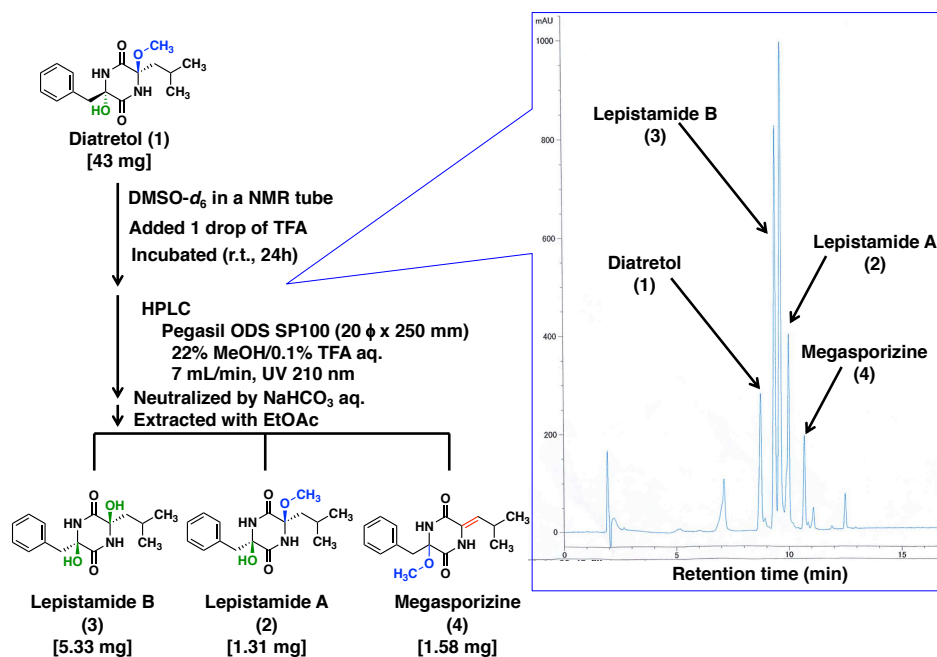

Scheme S3. Preparation of albonoursin (5) from diatretole (1)

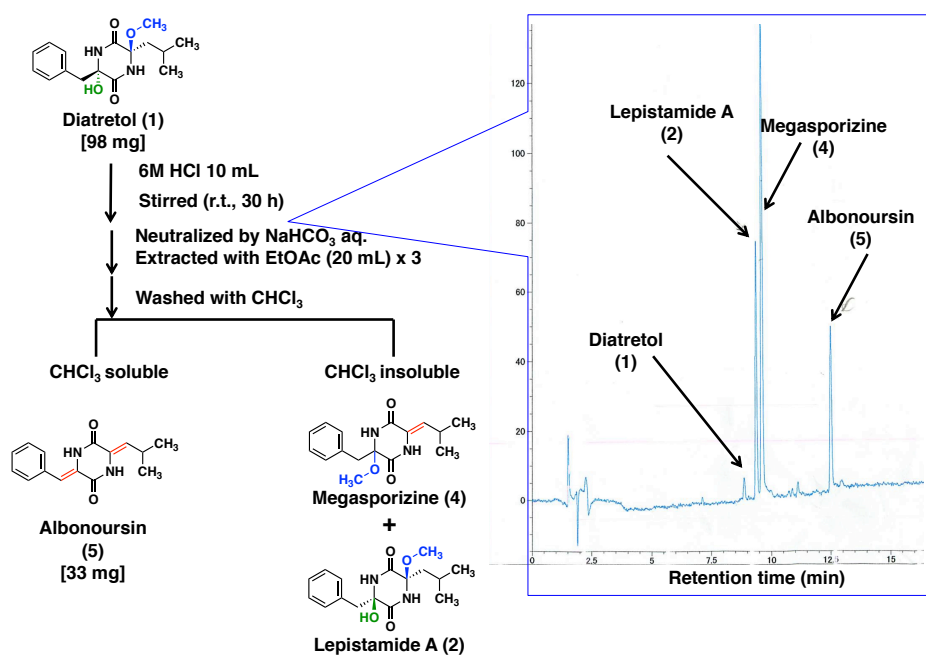

Fig. S1. Structures of naturally occurring  $\alpha, \alpha'$ -dioxo-diketopiperazines

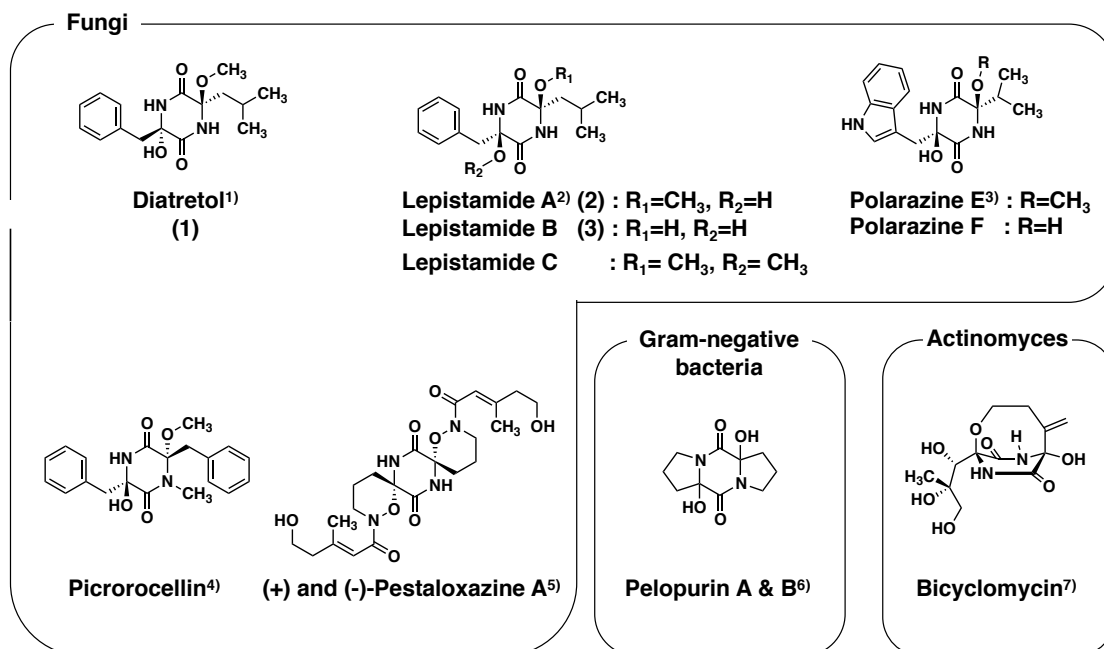

1) *Leibigs Ann.* 11, 1875 (1996)

4) *J. Chem. Soc.* 816 (1922)

6) *Nat. Prod. Res.*, 28, 680 (2014)

2) *Helv. Chem. Acta* 94, 1426 (2011)

5) *Tetrahedron Lett.*, 24, 1445 (1983)

7) *J. Antibiot.*, 25, 582 (1972)

3) *Phytochemistry* 58, 905 (2001)

5) *Org. Lett.*, 17, 4216 (2015)

Fig. S2. *In vitro* antimalarial activity of diatretol (1)

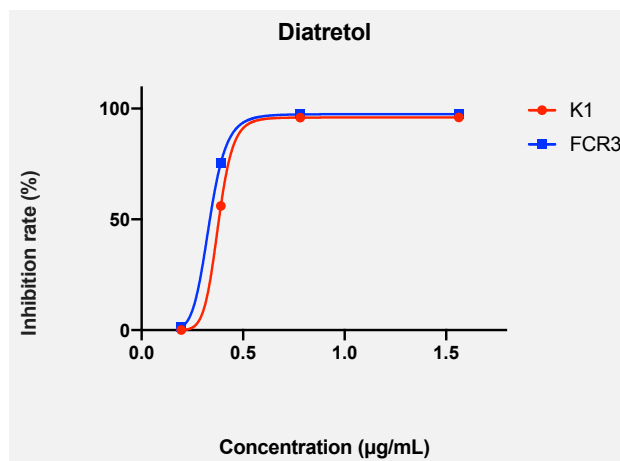

| X        | K1         |            |   | FCR3       |            |   |
|----------|------------|------------|---|------------|------------|---|
|          | Mean       | SD         | N | Mean       | SD         | N |
| 1.5625   | 95.9883333 | 0.24826062 | 3 | 97.4866667 | 0.30022214 | 3 |
| 0.78125  | 95.941     | 0.08313844 | 3 | 97.3706667 | 0.60855265 | 3 |
| 0.390625 | 56.065     | 0.87527196 | 3 | 75.5273333 | 1.17966789 | 3 |
| 0.195313 | 0          | 0          | 3 | 1.30966667 | 1.14739807 | 3 |
